# Supplementary material for: Structural diversity of transition-metal complexes derived from N-propionic acid functionalized 1,4,7-triazacyclononane: From enchanting cluster motifs to unprecedented homometallic polymeric networks
Source: Royal Society of Chemistry journal article supplement (doi:10.1039/c1ce05816a), 2011-12-05
Supplement: c1ce05816a.pdf [file c1ce05816a.pdf]

## Electronic Supplementary Information

# **Structural diversity of transition-metal complexes derived from *N*-propionic acid functionalized 1,4,7-triazacyclononane: From enchancing cluster motifs to unprecedented homometallic polymeric networks**

Zhong Zhang <sup>\*a</sup>, Jian-Qi Lu <sup>a</sup>, Di-Feng Wu <sup>a</sup>, Zi-Lu Chen <sup>a</sup>, Fu-Pei Liang <sup>\*a</sup>, and Zhi-Lin Wang <sup>b</sup>

<sup>a</sup> School of Chemistry & Chemical Engineering of Guangxi Normal University, Key Laboratory for the Chemistry and Molecular Engineering of Medicinal Resources (Ministry of Education of China), Guilin 541004, P. R. China

<sup>b</sup> State Key Laboratory of Coordination Chemistry, Coordination Chemistry Institute, Nanjing University, Nanjing 210093, P. R. China

\* To whom correspondence should be addressed. E-mail: zhangzhong@mailbox.gxnu.edu.cn

## Contents

**Table S1** Selected bond lengths (Å), angles (°) and hydrogen bonding for complex **1**

**Table S2** Selected bond lengths (Å), angles (°) and hydrogen bonding for complex **2**

**Table S3** Selected bond lengths (Å), angles (°) and hydrogen bonding for complex **3**

**Table S4** Selected bond lengths (Å), angles (°) and hydrogen bonding for complex **4**

**Fig. S1** IR spectra of the complexes **1–4**

**Table S1** Selected bond lengths (Å), angles (°) and hydrogen bonding for complex **1**

|                                  |            |          |                               |            |
|----------------------------------|------------|----------|-------------------------------|------------|
| Cu(1)–O(1)                       | 2.099(4)   |          | Cu(1)–N(1)                    | 2.120(5)   |
| Cu(2)–O(2)                       | 1.959(4)   |          | Cu(2)–O(3)                    | 1.936(5)   |
| Cu(2)–O(1)                       | 2.511(4)   |          |                               |            |
| O(1)–Cu(1)–N(1)                  | 89.29(19)  |          | O(1)–Cu(1)–N(1) <sup>i</sup>  | 171.0(2)   |
| O(1)–Cu(1)–N(1) <sup>ii</sup>    | 101.4(2)   |          | O(1)–Cu(1)–O(1) <sup>i</sup>  | 85.71(17)  |
| N(1)–Cu(1)–N(1) <sup>i</sup>     | 84.4(2)    |          | O(1)–Cu(2)–O(2)               | 56.49(15)  |
| O(1)–Cu(2)–O(3)                  | 90.1(2)    |          | O(1)–Cu(2)–O(1) <sup>ii</sup> | 150.37(13) |
| O(1)–Cu(2)–O(2) <sup>ii</sup>    | 100.99(15) |          | O(1)–Cu(2)–O(3) <sup>ii</sup> | 110.6(2)   |
| O(2)–Cu(2)–O(3)                  | 90.3(3)    |          | O(2)–Cu(2)–O(2) <sup>ii</sup> | 90.00(19)  |
| O(2)–Cu(2)–O(3) <sup>ii</sup>    | 166.8(3)   |          | O(3)–Cu(2)–O(3) <sup>ii</sup> | 92.3(3)    |
| D–H...A                          | d(D–H)     | d(H...A) | D(D...A)                      | ∠(D–H...A) |
| O(3)–H(3C)...O(2) <sup>iii</sup> | 0.85       | 2.05     | 2.678(8)                      | 130        |
| O(3)–H(3C)...O(12)               | 0.85       | 2.56     | 3.167(10)                     | 129        |
| O(3)–H(3D)...O(22)               | 0.85       | 2.17     | 2.695(15)                     | 120        |

Symmetry codes: i) 1–y,x–y,z; ii) y,x,1/2–z; iii) 1–y,1+x–y,z.

**Table S2** Selected bond lengths (Å), angles (°) and hydrogen bonding for complex **2**

|                                  |            |                                  |            |            |
|----------------------------------|------------|----------------------------------|------------|------------|
| Zn(2)–N(1)                       | 2.099(3)   | Zn(2)–N(2)                       | 2.093(3)   |            |
| Zn(2)–N(3)                       | 2.087(3)   | Zn(2)–O(1)                       | 2.080(2)   |            |
| Zn(2)–O(3)                       | 2.059(3)   | Zn(2)–O(5)                       | 2.068(2)   |            |
| Zn(1)–O(2)                       | 2.049(2)   | Zn(1)–O(7)                       | 2.110(3)   |            |
| Zn(3)–O(6)                       | 2.063(2)   | Zn(3)–O(11)                      | 2.076(4)   |            |
| Zn(3)–O(12)                      | 2.062(3)   | Zn(3)–O(13)                      | 2.107(4)   |            |
| Zn(4)–O(4)                       | 2.074(3)   | Zn(4)–O(8)                       | 2.083(4)   |            |
| Zn(4)–O(9)                       | 2.031(4)   | Zn(4)–O(10)                      | 2.074(3)   |            |
| O(2)–Zn(1)–O(7)                  | 86.09(11)  | O(7)–Zn(1)–O(7) <sup>i</sup>     | 180.00     |            |
| O(2)–Zn(1)–O(7) <sup>i</sup>     | 93.91(11)  | O(2)–Zn(1)–O(2) <sup>i</sup>     | 90.77(11)  |            |
| O(2)–Zn(1)–O(2) <sup>ii</sup>    | 180.00     | O(2)–Zn(1)–O(2) <sup>iii</sup>   | 89.23(11)  |            |
| O(1)–Zn(2)–O(3)                  | 86.64(11)  | O(1)–Zn(2)–O(5)                  | 87.96(10)  |            |
| O(1)–Zn(2)–N(1)                  | 91.03(11)  | O(1)–Zn(2)–N(2)                  | 175.41(11) |            |
| O(1)–Zn(2)–N(3)                  | 95.45(11)  | O(3)–Zn(2)–O(5)                  | 85.90(11)  |            |
| O(3)–Zn(2)–N(1)                  | 96.80(13)  | O(3)–Zn(2)–N(2)                  | 92.13(11)  |            |
| O(3)–Zn(2)–N(3)                  | 176.64(12) | O(5)–Zn(2)–N(1)                  | 177.06(13) |            |
| O(5)–Zn(2)–N(2)                  | 96.37(11)  | O(5)–Zn(2)–N(3)                  | 91.54(11)  |            |
| N(1)–Zn(2)–N(2)                  | 84.72(12)  | N(1)–Zn(2)–N(3)                  | 85.81(13)  |            |
| N(2)–Zn(2)–N(3)                  | 85.98(12)  | O(6)–Zn(3)–O(11)                 | 94.29(10)  |            |
| O(11)–Zn(3)–O(12)                | 88.58(10)  | O(11)–Zn(3)–O(13)                | 175.91(14) |            |
| O(6)–Zn(3)–O(12)                 | 91.11(10)  | O(6)–Zn(3)–O(13)                 | 88.68(10)  |            |
| O(6)–Zn(3)–O(6) <sup>iii</sup>   | 87.11(10)  | O(6)–Zn(3)–O(12) <sup>iii</sup>  | 176.73(11) |            |
| O(12)–Zn(3)–O(13)                | 88.54(10)  | O(12)–Zn(3)–O(12) <sup>iii</sup> | 90.54(11)  |            |
| O(8)–Zn(4)–O(9)                  | 179.21(13) | O(4)–Zn(4)–O(8)                  | 93.70(10)  |            |
| O(4)–Zn(4)–O(9)                  | 86.85(10)  | O(8)–Zn(4)–O(10)                 | 88.34(10)  |            |
| O(4)–Zn(4)–O(10)                 | 177.27(11) | O(9)–Zn(4)–O(10)                 | 91.09(10)  |            |
| O(4)–Zn(4)–O(10) <sup>iii</sup>  | 89.71(11)  | O(4)–Zn(4)–O(4) <sup>iii</sup>   | 91.97(11)  |            |
| O(10)–Zn(4)–O(10) <sup>iii</sup> | 88.52(12)  |                                  |            |            |
| D–H...A                          | d(D–H)     | d(H...A)                         | D(D...A)   | ∠(D–H...A) |
| O(7)–H(7C)...O(1) <sup>i</sup>   | 0.85       | 2.00                             | 2.686(3)   | 137        |
| O(7)–H(7D)...O(1) <sup>ii</sup>  | 0.85       | 2.08                             | 2.686(3)   | 128        |
| O(6)–H(8C)...O(3)                | 0.85       | 1.88                             | 2.636(3)   | 147        |

---

|                                     |      |      |          |     |
|-------------------------------------|------|------|----------|-----|
| O(8)–H(8D)···O(3) <sup>iii</sup>    | 0.85 | 1.89 | 2.636(3) | 145 |
| O(9)–H(9C)···O(16)                  | 0.85 | 2.39 | 2.721(6) | 104 |
| O(9)–H(9D)···O(16)                  | 0.85 | 2.26 | 2.721(6) | 114 |
| O(10)–H(10D)···O(14) <sup>iv</sup>  | 0.85 | 2.29 | 2.770(4) | 116 |
| O(10)–H(10C)···O(33) <sup>v</sup>   | 0.85 | 2.45 | 3.093(4) | 133 |
| O(11)–H(11C)···O(5)                 | 0.85 | 1.92 | 2.678(3) | 148 |
| O(11)–H(11D)···O(5) <sup>iii</sup>  | 0.85 | 2.00 | 2.678(3) | 136 |
| O(12)–H(12C)···O(15)                | 0.85 | 2.34 | 2.737(4) | 109 |
| O(12)–H(12D)···O(15)                | 0.85 | 2.33 | 2.737(4) | 110 |
| O(13)–H(13D)···O(13) <sup>vi</sup>  | 0.85 | 2.54 | 3.095(5) | 117 |
| O(13)–H(13C)···O(9) <sup>vii</sup>  | 0.85 | 2.50 | 3.095(5) | 128 |
| O(13)–H(13D)···O(13) <sup>vii</sup> | 0.85 | 2.33 | 3.032(5) | 140 |
| O(13)–H(13D)···O(6) <sup>viii</sup> | 0.85 | 2.23 | 2.884(4) | 134 |
| O(15)–H(15C)···O(31)                | 0.85 | 2.34 | 3.093(4) | 147 |

---

Symmetry codes: i) 2–x,y,2–z; ii) 2–x,–y,2–z; iii) x,–y,z; iv) x,–1+y,z; v) 1–x,–y,1–z; vi) 1–x,y,1–z;  
vii) 2–x,y,1–z; viii) 2–x,–y,1–z.

**Table S3** Selected bond lengths (Å), angles (°) and hydrogen bonding for complex **3**

|                                            |            |                               |            |            |
|--------------------------------------------|------------|-------------------------------|------------|------------|
| Cd(1)–O(3)                                 | 2.356(4)   | Cd(1)–O(3) <sup>i</sup>       | 2.301(4)   |            |
| Cd(1)–O(4) <sup>i</sup>                    | 2.626(5)   | Cd(1)–O(5)                    | 2.306(4)   |            |
| Cd(1)–N(1)                                 | 2.380(5)   | Cd(1)–N(2)                    | 2.412(5)   |            |
| Cd(1)–N(3)                                 | 2.353(5)   |                               |            |            |
| N(1)–Cd(1)–N(2)                            | 76.6(2)    | N(1)–Cd(1)–N(3)               | 77.97(18)  |            |
| N(2)–Cd(1)–N(3)                            | 76.29(19)  | O(3)–Cd(1)–N(1)               | 106.31(17) |            |
| O(3)–Cd(1)–N(2)                            | 79.62(18)  | O(3)–Cd(1)–N(3) <sup>i</sup>  | 130.95(16) |            |
| O(3) <sup>i</sup> –Cd(1)–N(1)              | 93.70(17)  | O(3) <sup>i</sup> –Cd(1)–N(2) | 149.1(2)   |            |
| O(3) <sup>i</sup> –Cd(1)–N(3)              | 130.95(18) | O(4) <sup>i</sup> –Cd(1)–N(1) | 105.29(18) |            |
| O(4) <sup>i</sup> –Cd(1)–N(2)              | 162.52(19) | O(4) <sup>i</sup> –Cd(1)–N(3) | 87.02(18)  |            |
| O(5)–Cd(1)–N(1)                            | 159.67(18) | O(5)–Cd(1)–N(2)               | 95.25(19)  |            |
| O(5)–Cd(1)–N(3)                            | 82.00(17)  | O(3)–Cd(1)–O(3) <sup>i</sup>  | 75.10(17)  |            |
| O(3)–Cd(1)–O(4) <sup>i</sup>               | 115.63(15) | O(3)–Cd(1)–O(5)               | 90.18(16)  |            |
| O(3) <sup>i</sup> –Cd(1)–O(4) <sup>i</sup> | 48.26(16)  | O(3) <sup>i</sup> –Cd(1)–O(5) | 102.17(16) |            |
| O(4) <sup>i</sup> –Cd(1)–O(5)              | 77.01(17)  |                               |            |            |
|                                            |            |                               |            |            |
| D–H...A                                    | d(D–H)     | d(H...A)                      | D(D...A)   | ∠(D–H...A) |
| O(1)–H(1C)...O(10) <sup>ii</sup>           | 0.85       | 2.11                          | 2.900 (7)  | 154        |
| O(6)–H(6C)...O(4) <sup>ii</sup>            | 0.85       | 2.28                          | 2.938(7)   | 135        |

Symmetry codes: i) 2–x, 1–y, 2–z; ii) 2–x, 1–y, 1–z; iii) x, –1+y, z.

**Table S4** Selected bond lengths (Å), angles (°) and hydrogen bonding for complex **4**

|                               |           |                               |           |            |
|-------------------------------|-----------|-------------------------------|-----------|------------|
| Cd(1)–O(1)                    | 2.321(8)  | Cd(1)–O(2) <sup>i</sup>       | 2.267(8)  |            |
| Cd(1)–O(3)                    | 2.313(9)  | Cd(1)–N(1)                    | 2.414(9)  |            |
| Cd(1)–N(2)                    | 2.340(10) | Cd(1)–N(3)                    | 2.376(11) |            |
| O(1)–Cd(1)–O(2) <sup>i</sup>  | 84.3(3)   | O(1)–Cd(1)–O(3)               | 85.4(3)   |            |
| O(2) <sup>i</sup> –Cd(1)–O(3) | 93.0(3)   | N(1)–Cd(1)–N(2)               | 76.0(3)   |            |
| N(1)–Cd(1)–N(3)               | 75.0(3)   | N(2)–Cd(1)–N(3)               | 76.6(4)   |            |
| O(1)–Cd(1)–N(1)               | 81.3(3)   | O(1)–Cd(1)–N(2)               | 157.2(3)  |            |
| O(1)–Cd(1)–N(3)               | 95.4(3)   | O(2) <sup>i</sup> –Cd(1)–N(1) | 161.3(3)  |            |
| O(2) <sup>i</sup> –Cd(1)–N(2) | 117.3(3)  | O(2) <sup>i</sup> –Cd(1)–N(3) | 94.7(3)   |            |
| O(3)–Cd(1)–N(1)               | 97.6(3)   | O(3)–Cd(1)–N(2)               | 99.8(4)   |            |
| O(3)–Cd(1)–N(3)               | 172.4(3)  |                               |           |            |
| D–H...A                       | d(D–H)    | d(H...A)                      | D(D...A)  | ∠(D–H...A) |
| N2–H2C...O2 <sup>ii</sup>     | 0.91      | 2.11                          | 3.013(13) | 172        |
| N3–H3C...O4 <sup>iii</sup>    | 0.91      | 2.48                          | 3.275(18) | 147        |
| O4–H4C...O2 <sup>ii</sup>     | 0.85      | 2.00                          | 2.760(13) | 149        |
| O3–H3D...O4                   | 0.85      | 1.90                          | 2.652(13) | 147        |

Symmetry codes: i)  $1/2-x, -1/2+y, 1/2-z$ ; ii)  $x, -1+y, z$ ; iii)  $1/2-x, 1/2+y, 1/2-z$ .

**Fig. S1** IR spectra of the complexes 1–4

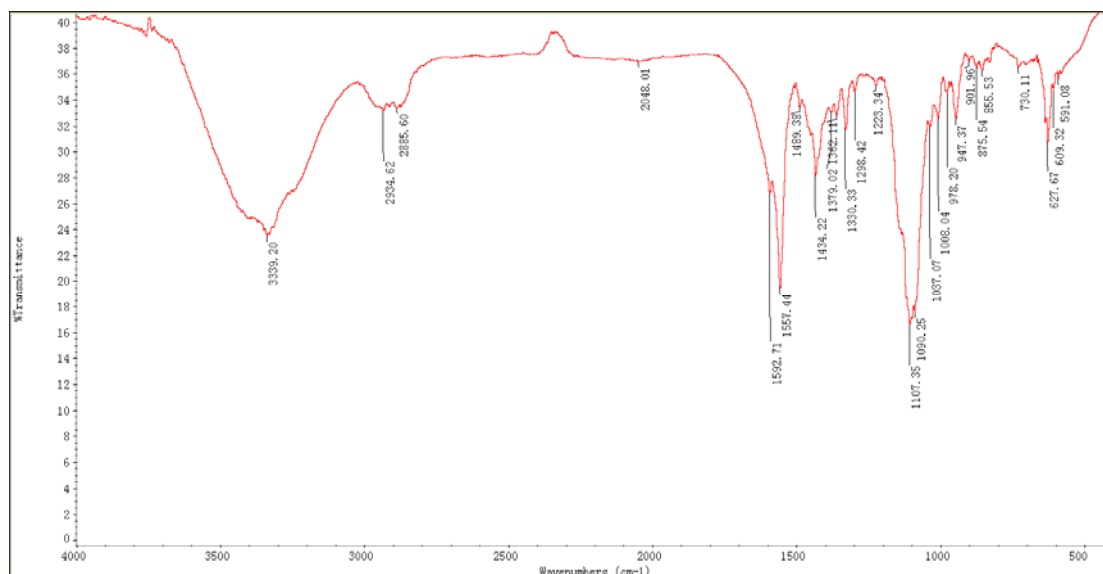

**Complex 1**

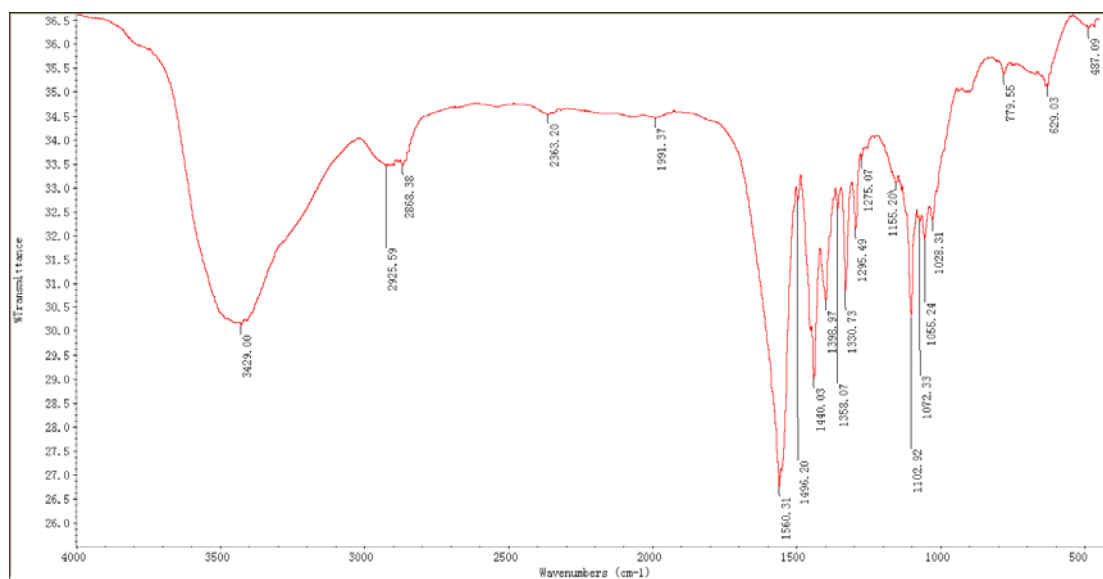

**Complex 2**



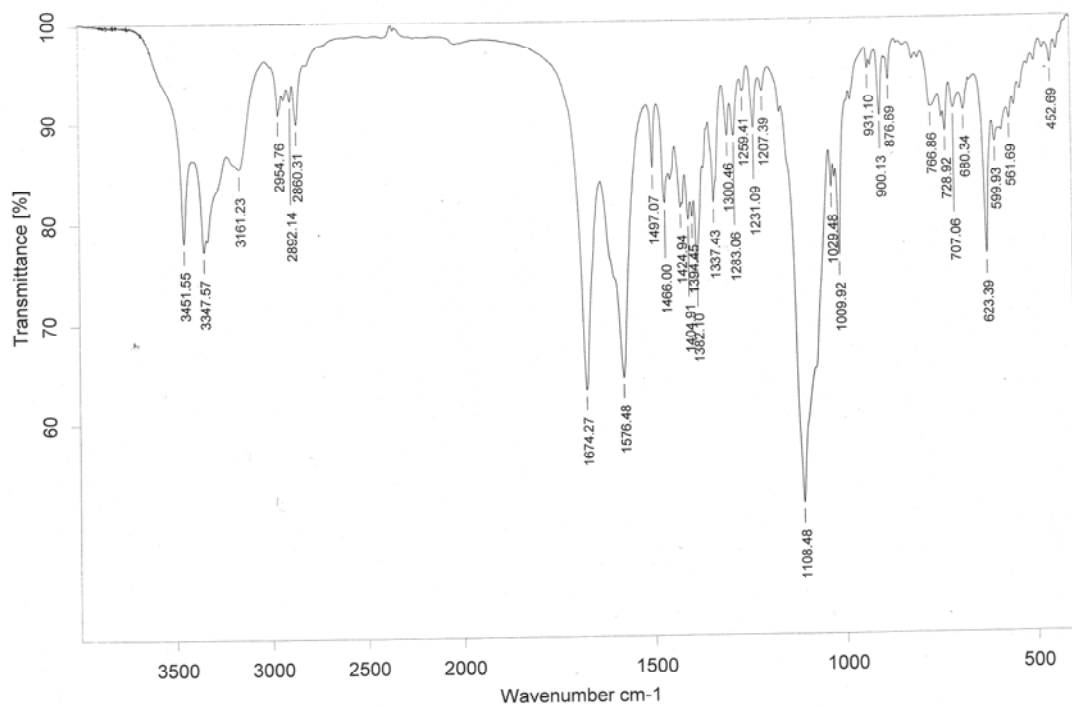

Complex 3

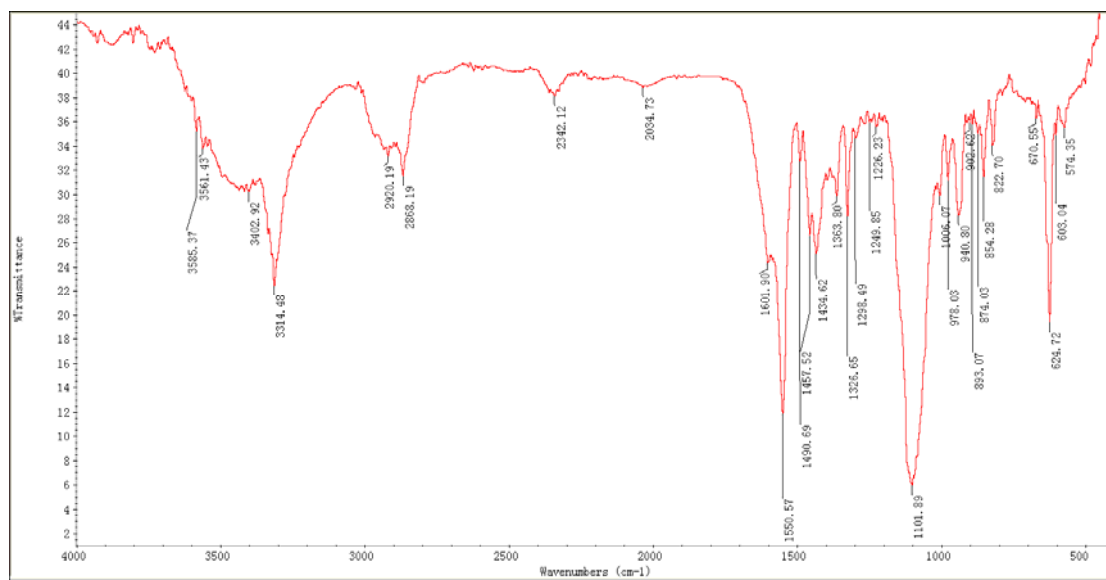

Complex 4
